# Supplementary material for: Zeolitic imidazolate framework-67 for shape stabilization and enhanced thermal stability of paraffin-based phase change materials
Source: Royal Society of Chemistry journal article supplement (doi:10.1039/c9ra00874h), 2019-01-01
Supplement: c9ra00874h1.pdf [file c9ra00874h1.pdf]

## Supporting information

# Zeolitic imidazolate framework-67 for shape stabilization and enhanced thermal stability of paraffin-based phase change materials

Yiwen Hu, \* Xiuduo Song, Qilong Zheng, jiangning Wang and Jiangfei Pei

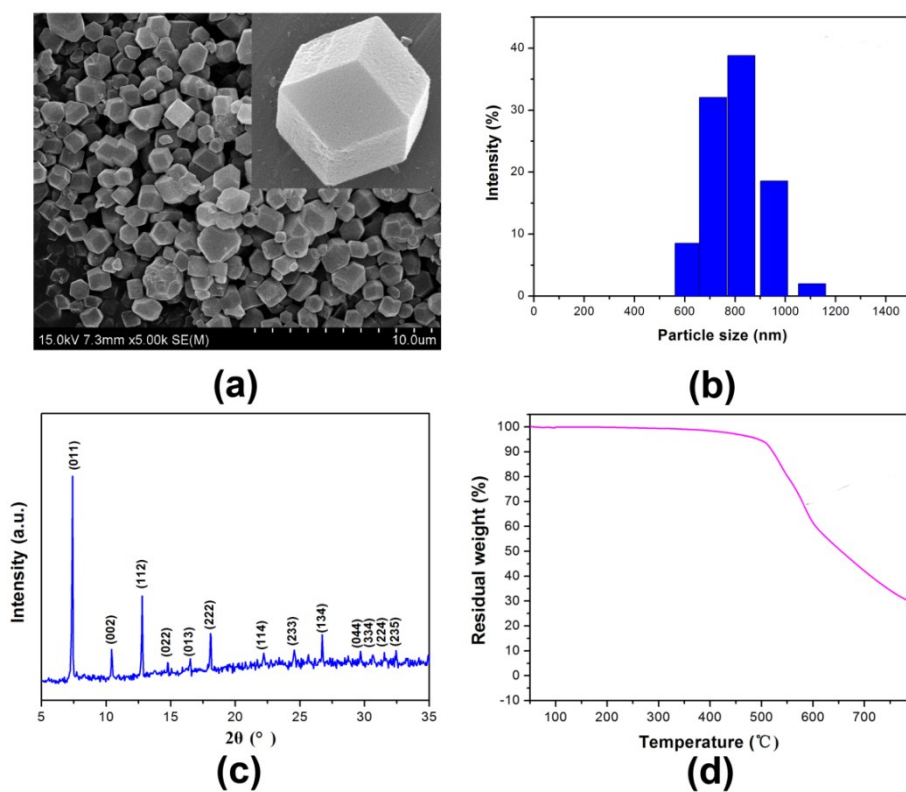

**Fig. S1** Characterization of ZIF-67: (a) SEM image (b) Particle size distribution, (c) XRD pattern, and (d) TG curve.

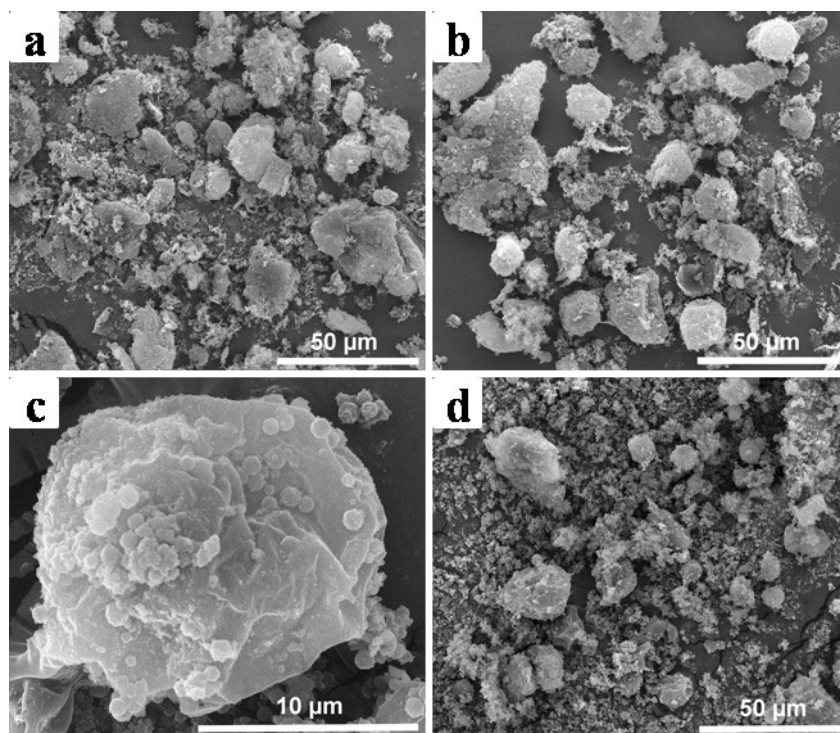

Fig. S2 SEM images of paraffin/PMMA/ZIF-67 composite PCMs with the ZIF-67 weight of 1.0g (a), 1.5g (b and c), and 2.5g (b).

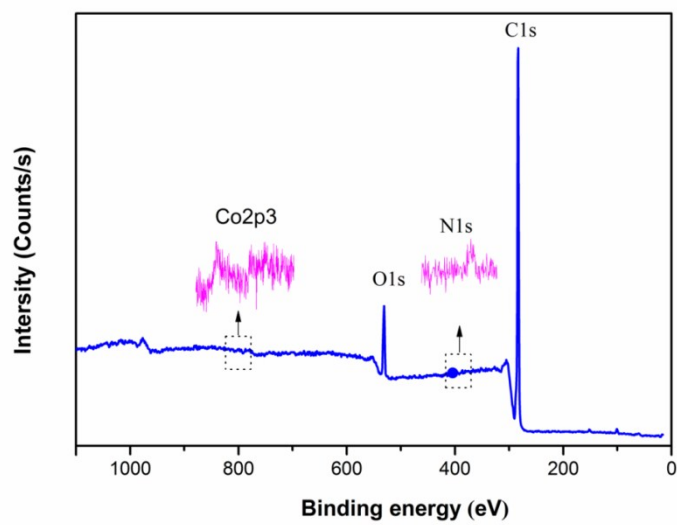

Fig.S3 XPS survey spectrum of the composite PCMs microcapsules (ZPCMs-3).
